# Supplementary material
Source: PubMed Central journal article supplement (PMC3538256)
Supplement: 1220456110_pnas.201220456SI.pdf [file 1220456110_pnas.201220456SI.pdf]

# Supporting Information

Pak-Wittel et al. 10.1073/pnas.1220456110

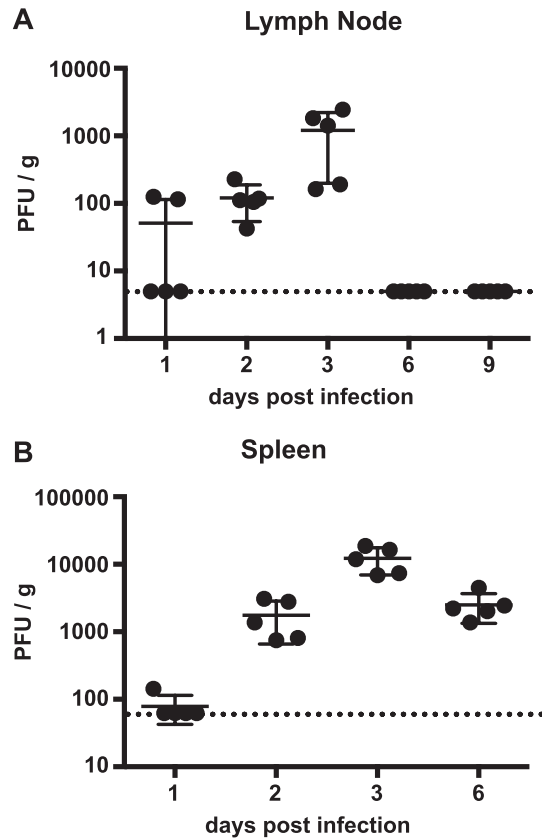

**Fig. S1.** Vaccinia virus (VV) replicates in both the draining lymph node (LN) and spleen following footpad infection. C57BL/6 mice were infected with  $1.5 \times 10^6$  pfu of VV in the footpad, and at the indicated time points, organs were removed and viral titers were assessed in the draining LN (A) and spleen (B) by plaque assay. Dotted lines indicate the limit of detection by the assay. Symbols indicate individual mice, and lines indicate the means.  $n = 5$  mice per group were analyzed for each time point.

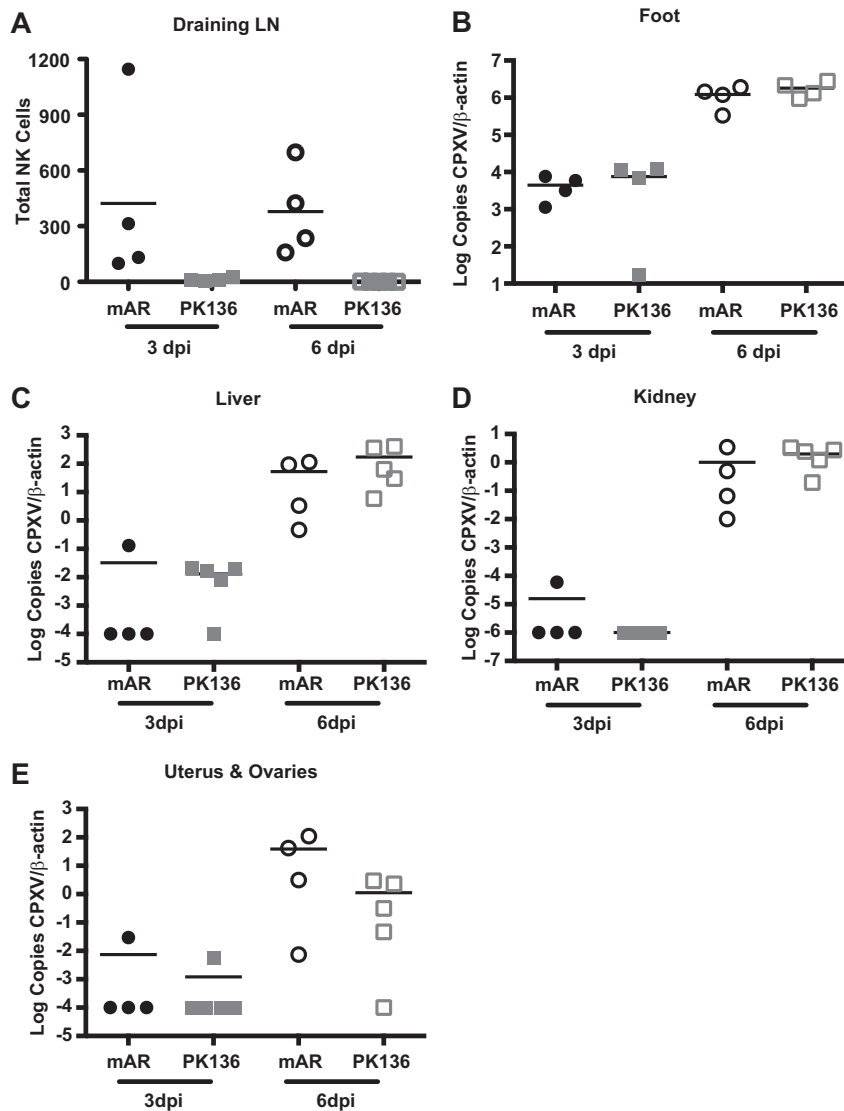

**Fig. S2.** Natural killer (NK) cells limit viral replication and spread following footpad infection. C57BL/6 mice were treated i.p. with 200  $\mu$ g of control antibody (mAR) or NK cell-depleting antibody (anti-NK1.1, PK136) 2 d before infection and 4 d postinfection (dpi). (A) Depletion was assessed in the nondraining lymph node (LN) by staining lymphocytes for NK1.1<sup>+</sup>NKp46<sup>+</sup>CD3<sup>-</sup>CD19<sup>-</sup> cells. At the indicated time points, organs were removed and viral titers were assessed by quantitative PCR in the foot (B), liver (C), kidney (D), and uterus and ovaries (E). Cowpox virus (CPXV) copy number was normalized to  $\beta$ -actin copy numbers and then multiplied by 1,000. Symbols indicate individual mice, and lines indicate the means.  $n = 4$ –5 mice per group were analyzed for each time point. Data are representative of three independent experiments.
